# Supplementary material
Source: PubMed Central journal article supplement (PMC8597188)
Supplement: sj-pdf-1-msj-10.1177_13524585211002097.pdf [file sj-pdf-1-msj-10.1177_13524585211002097.pdf]

**Table e-1: Reasons for initial brain MRI**

| <b>Reason</b>                                                    | <b>n of subjects (%)</b> |
|------------------------------------------------------------------|--------------------------|
| Headaches                                                        | 11 (39%)                 |
| Work up for pituitary adenoma                                    | 2 (7%)                   |
| Transient paraphasic symptoms atypical for demyelinating disease | 2 (7%)                   |
| Tinnitus                                                         | 2 (7%)                   |
| Incidental ophthalmologic findings                               | 2 (7%)                   |
| Intermittent nocturnal tremor                                    | 1 (4%)                   |
| Intermittent subjective cognitive symptoms                       | 1 (4%)                   |
| Sinusitis                                                        | 1 (4%)                   |
| Back pain                                                        | 1 (4%)                   |
| Dental pain                                                      | 1 (4%)                   |
| Hearing loss                                                     | 1 (4%)                   |
| Brief abnormal sensation left leg                                | 1 (4%)                   |
| Transient visual obscuration lasting seconds                     | 1 (4%)                   |
