# Supplementary material
Source: PubMed Central journal article supplement (PMC8597188)
Supplement: sj-pdf-2-msj-10.1177_13524585211002097.pdf [file sj-pdf-2-msj-10.1177_13524585211002097.pdf]

**Table e2: Imaging measures of interest and cognitive impairment in each RIS case**

| RIS case | %CVS+WML<br>≥ 40% | ≥ 1 PRL | ≥ 1 SC Lesion | Global CI |
|----------|-------------------|---------|---------------|-----------|
| 1        | +                 | +       | +             | -         |
| 2        | +                 | +       | +             | +         |
| 3        | +                 | +       | +             | +         |
| 4        | +                 | +       | +             | -         |
| 5        | +                 | +       | +             | -         |
| 6        | +                 | +       | +             | +         |
| 7        | -                 | -       | -             | -         |
| 8        | +                 | -       | +             | -         |
| 9        | +                 | -       | +             | +         |
| 10       | +                 | -       | -             | -         |
| 11       | +                 | +       | -             | +         |
| 12       | +                 | +       | -             | -         |
| 13       | +                 | +       | +             | +         |
| 14       | +                 | +       | -             | +         |
| 15       | +                 | +       | +             | -         |
| 16       | -                 | -       | -             | -         |
| 17       | +                 | -       | +             | +         |
| 18       | +                 | +       | +             | -         |
| 19       | +                 | -       | +             | -         |
| 20       | +                 | -       | +             | -         |
| 21       | +                 | +       | -             | -         |
| 22       | +                 | +       | +             | +         |
| 23       | +                 | -       | -             | -         |
| 24       | +                 | +       | +             | -         |
| 25       | +                 | +       | +             | -         |
| 26       | +                 | -       | +             | -         |
| 27       | +                 | +       | +             | -         |

\*RIS = radiologically-isolated syndrome; CVS+WML = central vein sign positive white-matter lesion; PRL = paramagnetic rim lesion; SC = spinal cord; CI = cognitive impairment
